# Supplementary material for: Chemical Solution Deposition of Ordered 2D Arrays of Room-Temperature Ferrimagnetic Cobalt Ferrite Nanodots
Source: PubMed Central journal article supplement (PMC6835257; doi:10.3390/polym11101598), 2019-09-30
Supplement: polymers-11-01598-s001.pdf [file polymers-11-01598-s001.pdf]

*Supplementary Material*

# Chemical Solution Deposition of Ordered Arrays of Room-Temperature Ferrimagnetic Cobalt Ferrite Nanodots

Jin Xu, Justin Varghese, Giuseppe Portale, Alessandro Longo, Jamo Momand,  
Ali Syari'ati, Jeroen A. Heuver, Petra Rudolf, Bart J. Kooi, Beatriz Noheda,  
Katja Loos

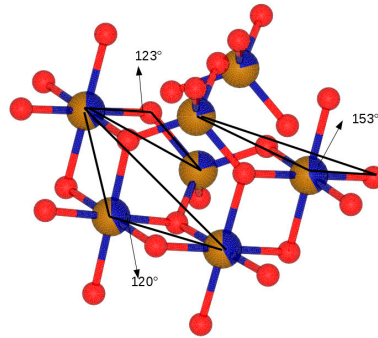

**Figure S1.** Schematic representation of the spinel structure, where the red spheres represent O atoms, the blue/yellow spheres represent the Co or Fe atoms, and the blue/red sticks represent the atomic bonds. The black lines are the visual aids marking the three Co–O···M or O–Co···M alignments considered in the three-body simulation.

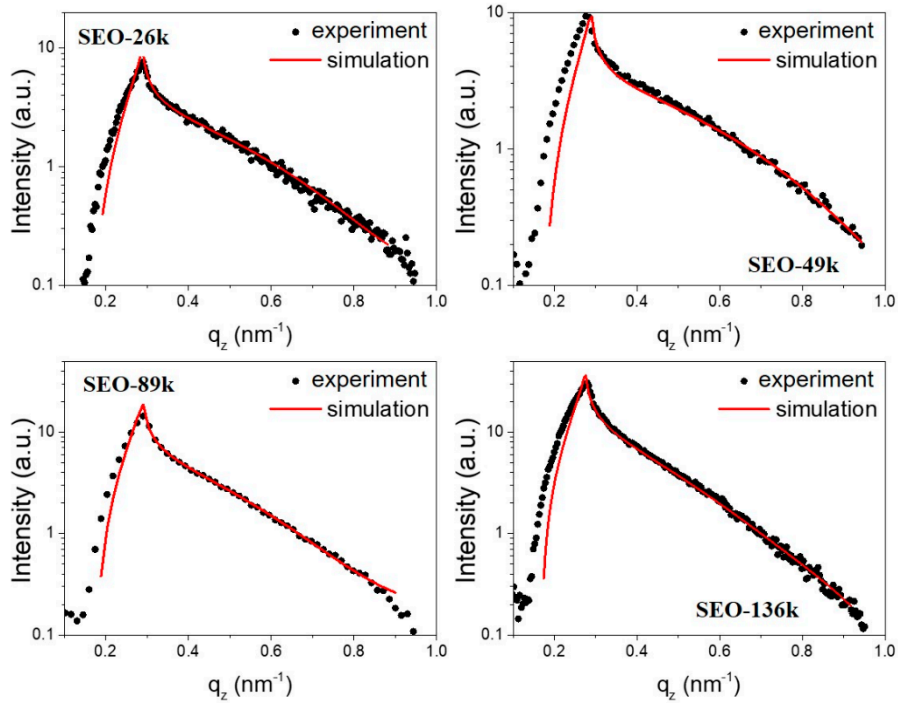

**Figure S2.** 1D GISAXS plots along the  $q_z$  direction of the CFO nanodots prepared from different templates, in which the red curves are the simulation results, and the black points are the experimental results.

**Table S1.** Structural parameters obtained from the simulated and experimental GISAXS results, where  $q_1$  is the position of the first scattering peak along  $q_y$  and inter-row distance is the distance between two rows of dots.

| Template                   | SEO-26k                   | SEO-49k                   | SEO-89k               | SEO-136k              |
|----------------------------|---------------------------|---------------------------|-----------------------|-----------------------|
| $q_1$ ( $\text{nm}^{-1}$ ) | 0.22                      | 0.20                      | 0.12                  | 0.09                  |
| Inter-row Distance (nm)    | 29.0                      | $30.8 \pm 4.0$            | $46.5 \pm 9.7$        | $53.8 \pm 26.9$       |
| Lattice type               | Paracrystalline<br>HEX 2D | Paracrystalline<br>HEX 2D | Paracrystalline<br>1D | Paracrystalline<br>1D |
| Diameter (nm)              | 20.1                      | $20 \pm 2.6$              | $26.3 \pm 5.5$        | $30 \pm 15$           |
| Height (nm)                | 7.3                       | $6.7 \pm 0.9$             | $8.6 \pm 1.8$         | $9.0 \pm 4.5$         |

**Table S2.** Two-body simulation results at Fe K-edge of the CFO standard and the nanodots annealed at 950 °C, where CN is the coordination number, R is the atomic distance, and  $\sigma$  is the Debye–Waller factor indicating the static and thermal disorder of the shell.

| Shell                             | CFO nanodots |      |                              | CFO commercial nanopowder |      |                              |
|-----------------------------------|--------------|------|------------------------------|---------------------------|------|------------------------------|
|                                   | CN           | R(Å) | $\sigma^2$ (Å <sup>2</sup> ) | CN                        | R(Å) | $\sigma^2$ (Å <sup>2</sup> ) |
| Fe <sup>1</sup> –O                | 4.0          | 1.86 | 0.003                        | 3.6                       | 1.84 | 0.002                        |
| Fe <sup>2</sup> –O                | 5.1          | 2.06 | 0.001                        | 5.4                       | 2.07 | 0.003                        |
| Fe <sup>2</sup> ...M <sup>2</sup> | 5.1          | 3.00 | 0.003                        | 5.4                       | 3.00 | 0.007                        |
| Fe <sup>2</sup> ...M <sup>1</sup> | 5.1          | 3.50 | 0.002                        | 5.4                       | 3.52 | 0.010                        |
| Fe <sup>1</sup> ...M <sup>2</sup> | 11.9         | 3.52 | 0.003                        | 10.8                      | 3.46 | 0.001                        |

**Table S3.** Three-body simulation results at Fe K-edge of the CFO standard and the nanodots annealed at 950 °C.

| Atoms                   | O–Fe <sup>1</sup> –O | O–Fe <sup>1</sup> ...M <sup>2</sup> | O–Fe <sup>2</sup> ...M <sup>1</sup> | M <sup>2</sup> ...Fe <sup>2</sup> ...M <sup>2</sup> |
|-------------------------|----------------------|-------------------------------------|-------------------------------------|-----------------------------------------------------|
| Nanopowder $\theta$ (°) | 120                  | 85.47                               | 153.70                              | 120.70                                              |
| Nanodots $\theta$ (°)   | 120                  | 80.44                               | 153.70                              | 120.70                                              |

**Table S4.** Magnetic parameters of the nanodots, in which  $H_c$  is the coercive field of the nanodots at 300 K.

| Template | Dot Diameter (nm) | Dot Height (nm) | $H_c$ (Oe) | $T_b$ (K) |
|----------|-------------------|-----------------|------------|-----------|
| SEO-26k  | 20.1              | 7.3             | 89         | 312       |
| SEO-49k  | 20 ± 2.6          | 6.7             | 96         | 323       |
| SEO-89k  | 26.3 ± 5.5        | 8.6             | 282        | 343       |
| SEO-136k | 30 ± 15           | 9               | 366        | 350       |
